# Supplementary material for: Quantification of harms in cancer screening trials: literature review
Source: PubMed Central journal article supplement — BMJ. 2013 Sep 16;347:f5334. doi: 10.1136/bmj.f5334 (PMC4793399; doi:10.1136/bmj.f5334), 2013-09-16
Supplement: helb011664.ww1_default.pdf [file helb011664.ww1_default.pdf]

## **Appendix 1: [posted as supplied by author]**

### **Search updates for technologies reviewed in a Cochrane Systematic Review (CENTRAL, The Cochrane Library Website, 01/06/2012) -**

#### **Breast cancer screening with self-examination or clinical examination**

- #1 MeSH descriptor: [Breast Neoplasms] explode all trees
- #2 breast cancer
- #3 #1 or #2
- #4 MeSH descriptor: [Breast Self-Examination] explode all trees
- #5 MeSH descriptor: [Self-Examination] explode all trees
- #6 #3 and #5
- #7 #4 or #6
- #8 MeSH descriptor: [Physical Examination] explode all trees
- #9 #3 and #8
- #10 #7 or #9
- #12 #11 from 2008 to 2012

#### **Breast cancer screening with mammography**

- #1 MeSH descriptor: [Breast Neoplasms] explode all trees
- #2 breast cancer
- #3 MeSH descriptor: [Mammography] explode all trees
- #4 mammograph\*
- #5 #1 or #2 or #3 or #4
- #6 MeSH descriptor: [Mass Screening] explode all trees
- #7 screen\*
- #8 #6 or #7
- #9 #5 and #8
- #10 (Alexander F\*):au or (Andersson I\*):au or (Baines C\*):au or (Bjurstam N\*):au or (Duffy S\*):au or (Fagerberg G\*):au or (Frisell J\*):au or (Miller AB):au or (Moss S\*):au or (Nystrom L\*):au or (Shapiro S\*):au or (Tabar L\*):au
- #11 #9 or #10
- #12 #11 from 2008 to 2012

#### **Colorectal cancer screening with faecal occult blood testing**

- #1 MeSH descriptor: [Mass Screening] explode all trees
- #2 MeSH descriptor: [Population Surveillance] explode all trees
- #3 (screen\* or test\* or (population\* near/2 surveillance) or (early near/3 detect\*) or (early near/3 prevent\*)):ti,kw,ab
- #4 #1 or #2 or #3
- #5 MeSH descriptor: [Colorectal Neoplasms] explode all trees
- #6 MeSH descriptor: [Colonic Neoplasms] explode all trees
- #7 MeSH descriptor: [Rectal Neoplasms] explode all trees

- #8 (colorectal\* or CRC or colon\* or bowel\* or intestine\* or large intestine\* or rectal or rectum or sigmoid or anal or anus) and (cancer or neoplasm\* or malign\* or tumor or tumour\* or carcinom\* or sarcom\* or adenocarcinom\* or adeno?carcinom\* or adenom\* or lesion\*):ti,ab,kw
- #9 #5 or #6 or #7 or #8
- #10 MeSH descriptor: [Occult Blood] explode all trees
- #11 MeSH descriptor: [Endoscopy, Gastrointestinal] explode all trees
- #12 MeSH descriptor: [Colonoscopy] explode all trees
- #13 MeSH descriptor: [Sigmoidoscopy] explode all trees
- #14 MeSH descriptor: [Proctoscopy] explode all trees
- #15 MeSH descriptor: [Enema] explode all trees
- #16 (faecal or fecal or (stool near occult) or FOBT or FOB or haemoccult or hemoccult or sensa or coloscreen or seracult or ez-detect or colocare or flexsure or hemmoquant or hemeselect or immudia or monohaem or insure or hemodia or instantview or innocare or magstream or (guaiac near/1 smear\*) or endoscop\* or proctoscop\* or colonoscop\* or sigmoidoscop\* or rectosigmoidoscop\* or proctosigmoidoscop\* or COL or SIG or FSIG or (barium near/1 enema) or DCBE):ti,ab
- #17 #10 or #11 or #12 or #13 or #14 or #15 or #16
- #18 #4 and #9 and #17
- #19 #18 from 2010 to 2012

### **Liver cancer screening**

- #1 MeSH descriptor: [alpha-Fetoproteins] explode all trees
- #2 (alpha-fetoprotein\* or alfa-fetoprotein\* or alpha-foetoprotein\* or alfa-foetoprotein\* or alpha-fetalprotein\* or alfa-fetalprotein\* or alpha fetoprotein\* or alfa fetoprotein\* or alpha foetoprotein\* or alfa foetoprotein\* or alpha fetalprotein\*):ti,ab,kw
- #3 #1 or #2
- #4 MeSH descriptor: [Ultrasonography] explode all trees
- #5 (ecograph\* or echograph\* or ultrasonograph\*):ti,ab,kw
- #6 #4 or #5
- #7 MeSH descriptor: [Hepatitis B] explode all trees
- #8 (hepatitis b):ti,kw,ab
- #9 #7 or #8
- #10 #3 or #6
- #11 #9 and #10
- #12 #11 from 2002 to 2012

### **Lung cancer screening with chest X-ray**

- #1 LUNG and CANCER
- #2 BRONCHOGENIC and CARCINOMA
- #3 LUNG and NEOPLASM\*
- #4 #1 or #2 or #3
- #5 Screen\*
- #6 #4 and #5
- #7 #6 from 2007 to 2012

### **Oral cancer screening**

- #1 MeSH descriptor: [Mouth] explode all trees
- #2 MeSH descriptor: [Lip] explode all trees

- #3 MeSH descriptor: [Gingiva] explode all trees
- #4 MeSH descriptor: [Tongue] explode all trees
- #5 MeSH descriptor: [Oropharynx] explode all trees
- #6 MeSH descriptor: [Hypopharynx] explode all trees
- #7 MeSH descriptor: [Palate] explode all trees
- #8 MeSH descriptor: [Cheek] explode all trees
- #9 mouth\* or lip\* tongue\* or gingiv\* or oropharynx or palate\* or cheek\*
- #10 #1 or #2 or #3 or #4 or #5 or #6 or #7 or #8 or #9
- #11 MeSH descriptor: [Mouth Neoplasms] explode all trees
- #12 MeSH descriptor: [Precancerous Conditions] explode all trees
- #13 tumor or tumour or cancer\* or carcinoma\*
- #14 malignan\*
- #15 dysplasia\*
- #16 oral near/6 cancer\*
- #17 #11 or #12 or #13 or #14 or #15 or #16
- #18 MeSH descriptor: [Mass Screening] explode all trees
- #19 "visual\* screen\*"
- #20 "tolonium chloride"
- #21 MeSH descriptor: [Tolonium Chloride] this term only
- #22 "toluidine blue"
- #23 MeSH descriptor: [Toluidines] explode all trees
- #24 "toluidine dye"
- #25 "brush biopsy" or "exfoliate cytology"
- #26 "fluorescent imaging"
- #27 ("fluorescent dye\* OR "fluorescent antibody technique" OR fluorescence)
- #28 prevent\*
- #29 screen\*
- #30 early near/3 detect\*
- #31 (#18 or #19 or #20 or #21 or #22 or #23 or #24 or #25 or #26 or #27 or #28 or #29 or #30)
- #32 (#10 and #17 and #31)
- #33 #32 from 2010 to 2012

### **Prostate cancer screening**

- #1 MeSH descriptor: [Prostate-Specific Antigen] explode all trees
- #2 (prostate next specific next antigen)
- #3 psa
- #4 MeSH descriptor: [Digital Rectal Examination] explode all trees
- #5 (digital next rectal next examination)
- #6 dre
- #7 (transrectal next ultrasound\*)
- #8 trus
- #9 (#1 or #2 or #3 or #4 or #5 or #6 or #7 or #8)
- #10 MeSH descriptor: [Mass Screening] explode all trees
- #11 screening
- #12 (#10 or #11)
- #13 MeSH descriptor: [Prostatic Neoplasms] explode all trees
- #14 (prostat\* next cancer)
- #15 (#13 or #14)

- #16 #9 and #12 and #15
- #17 #16 from 2010 to 2012

### **Testicular cancer screening**

- #1 MeSH descriptor: [Testicular Neoplasms] explode all trees
- #2 (testicular cancer):ti,kw,ab
- #3 (testicular self examination):ti,kw,ab
- #4 (testicular exam\*):ti,kw,ab
- #5 MeSH descriptor: [Self-Examination] explode all trees
- #6 (self-exam\*):ti,kw,ab
- #7 (testicular examination):ti,kw,ab
- #8 (testicular exam\*):ti,kw,ab
- #9 (physician exam):ti,kw,ab
- #10 MeSH descriptor: [Physical Examination] explode all trees
- #11 (physical exam\*):ti,kw,ab
- #12 MeSH descriptor: [Mass Screening] explode all trees
- #13 screening:ti,kw,ab
- #14 #1 or #2
- #15 #3 or #4 or #5 or #6 or #7 or #8 or #9 or #10 or #11 or #12 or #13
- #16 #14 and #15
- #17 #16 from 2010 to 2012

## **Search strategy for technologies with no Cochrane Systematic Review (CENTRAL, The Cochrane Library Website, 01/06/2012)**

### **Colorectal cancer screening with gastrointestinal endoscopy**

- #1 MeSH descriptor: [Mass Screening] explode all trees
- #2 MeSH descriptor: [Population Surveillance] explode all trees
- #3 (screen\* or test\* or (population\* near/2 surveillance) or (early near/3 detect\*) or (early near/3 prevent\*)):ti,kw,ab
- #4 #1 or #2 or #3
- #5 MeSH descriptor: [Endoscopy] explode all trees
- #6 MeSH descriptor: [Colonoscopy] explode all trees
- #7 MeSH descriptor: [Sigmoidoscopy] explode all trees
- #8 MeSH descriptor: [Proctoscopy] explode all trees
- #9 (endoscop\* or proctoscop\* or colonoscop\* or sigmoidoscop\* or rectosigmoidoscop\* or proctosigmoidoscop\* or fibrosigmoidoscop\* or COL or SIG or FSIG) or (flex\* near/3 sig\*):ti,ab,kw
- #10 #5 or #6 or #7 or #8 or #9
- #11 MeSH descriptor: [Colorectal Neoplasms] explode all trees
- #12 MeSH descriptor: [Colonic Neoplasms] explode all trees
- #13 MeSH descriptor: [Rectal Neoplasms] explode all trees
- #14 (colorectal\* or CRC or colon\* or bowel\* or intestine\* or large intestine\* or rectal or rectum or sigmoid or anal or anus) and (cancer or neoplasm\* or malign\* or tumor or tumour\* or carcinom\* or sarcom\* or adenocarcinom\* or adeno?carcinom\* or adenom\* or lesion\*):ti,ab,kw
- #15 #11 or #12 or #13 or #14
- #16 #4 and #10 and #15

### **Colorectal cancer screening with computed tomography**

- #1 MeSH descriptor: [Mass Screening] explode all trees
- #2 MeSH descriptor: [Population Surveillance] explode all trees
- #3 (screen\* or test\* or (population\* near/2 surveillance) or (early near/3 detect\*) or (early near/3 prevent\*)):ti,kw,ab
- #4 #1 or #2 or #3
- #5 MeSH descriptor: [Colorectal Neoplasms] explode all trees
- #6 MeSH descriptor: [Colonic Neoplasms] explode all trees
- #7 MeSH descriptor: [Rectal Neoplasms] explode all trees
- #8 (colorectal\* or CRC or colon\* or bowel\* or intestine\* or large intestine\* or rectal or rectum or sigmoid or anal or anus) and (cancer or neoplasm\* or malign\* or tumor or tumour\* or carcinom\* or sarcom\* or adenocarcinom\* or adeno?carcinom\* or adenom\* or lesion\*):ti,ab,kw
- #9 #5 or #6 or #7 or #8
- #10 MeSH descriptor: [Tomography, Spiral Computed] explode all trees
- #11 (((CT or (comput\* tomogra\*)) near/10 (colorectal\* or CRC or colon or colonic or bowel\* or intestine or (large near/2 intestine) or rectal or rectum or sigmoid or anal or anus)) or (virtual near/2 colono\*)):ti,ab,kw
- #12 #10 or #11
- #13 #4 and #9 and #12

## **Lung cancer screening with computed tomography**

- #1 MeSH descriptor: [Mass Screening] explode all trees
- #2 MeSH descriptor: [Population Surveillance] explode all trees
- #3 (screen\* or test\* or (population\* near/2 surveillance) or (early near/3 detect\*) or (early near/3 prevent\*)):ti,kw,ab
- #4 MeSH descriptor: [Lung Neoplasms] explode all trees
- #5 ((lung\* or pulmon\* or bronch\*) near/10 (tumor\* or tumour\* or cancer or neoplas\* or carcinoma\* or adenocarcinoma\* or squamous or (oat near/2 cell) or (small near/2 cell))):ti,kw,ab
- #6 (lung and cancer) or (bronchogenic and carcinoma) or (lung and neoplasm\*)
- #7 MeSH descriptor: [Carcinoma, Bronchogenic] explode all trees
- #8 MeSH descriptor: [Lung] explode all trees
- #9 MeSH descriptor: [Neoplasms] explode all trees
- #10 #8 and #9
- #11 MeSH descriptor: [Tomography, Spiral Computed] explode all trees
- #12 ((comput\* near/2 tomogra\*) or CT):ti,kw,ab
- #13 #1 or #2 or #3
- #14 (#4 or #5 or #6 or #7 or #10)
- #15 #11 or #12
- #16 #13 and #14 and #15

## **Ovarian cancer screening**

- #1 MeSH descriptor: [Mass Screening] explode all trees
- #2 MeSH descriptor: [Population Surveillance] explode all trees
- #3 (screen\* or test\* or (population\* near/2 surveillance) or (early near/3 detect\*) or (early near/3 prevent\*)):ti,kw,ab
- #4 #1 or #2 or #3
- #5 MeSH descriptor: [Ovarian Neoplasms] explode all trees
- #6 ovar\* and (cancer\* or carcinoma\* or neoplasm\* or tumor\* or tumour\* or malignan\*):ti,ab,kw
- #7 #5 or #6
- #8 #4 and #7

**Search strategies for EMBASE (1974-14/Aug/2012) and Ovid MEDLINE (1974-14/Aug/2012) and Ovid MEDLINE In-process & other non-indexed citations (-14/Aug/2012)**

- 1 (Pisani P\* or Laudico A\*).au. and clinical breast examination.ti,ab,kw.
- 2 (Sankaranarayanan R\* or Mathew B\*).au. and clinical breast examination.ti,ab,kw.
- 3 (Mittra I\* or Shastri S\*).au. and clinical breast examination.ti,ab,kw.
- 4 (Semiglazov V\* or Moiseenko V\*).au. and self examination.ti,ab,kw.
- 5 (Thomas D\* or Dao-Li G\*).au. and self examination.ti,ab,kw.
- 6 (Miller AB or Boulos S\*).au. and (breast examination or self examination).ti,ab,kw.
- 7 1 or 2 or 3 or 4 or 5 or 6
- 8 (Kubik A\* or Parkin D\*).au. and lung cancer.ti,ab,kw. and screen\*.ti,ab,kw.
- 9 Wilde J\*.au. and lung cancer.ti,ab,kw. and screen\*.ti,ab,kw.
- 10 (Frost J\* or Stitik F\*).au. and lung cancer.ti,ab,kw. and screen\*.ti,ab,kw.
- 11 ((Dales L\* or Friedman G\*).au. or multiphasic.ti,ab,kw.) and lung cancer.ti,ab,kw. and screen\*.ti,ab,kw.
- 12 (Fontana R\* or Marcus P\*).au. and lung cancer.ti,ab,kw. and screen\*.ti,ab,kw.
- 13 "Mayo Lung Project".ti,ab,kw.
- 14 (Flehinger B\* or Melamed M\*).au. and lung cancer.ti,ab,kw. and screen\*.ti,ab,kw.
- 15 Brett G\*.au. and lung cancer.ti,ab,kw. and screen\*.ti,ab,kw.
- 16 (Oken M\* or Pinsky P\*).au. and lung cancer.ti,ab,kw. and screen\*.ti,ab,kw.
- 17 8 or 9 or 10 or 11 or 12 or 13 or 14 or 15 or 16
- 18 ((Selby J\* or Collen M\*).au. or multiphasic.ti,ab,kw.) and (screen\* adj5 sigmoidoscopy).ti,ab,kw
- 19 (Norwegian Colorectal Cancer Prevention or NORCCAP).af.
- 20 (Hoff G\* or Bretthauer M\*).au. and (screen\* adj5 sigmoidoscopy).ti,ab,kw.
- 21 ((Screening for Colon Rectum or SCORE) and (screen\* adj5 sigmoidoscopy)).af.
- 22 (Segnan N\* or Senore C\*).au. and (screen\* adj5 sigmoidoscopy).ti,ab,kw.
- 23 (colonprev.ti,au,ab,kw. or (Quintero E or Gonzalez-Navarro A).au.) and (screen\* or cribado).ti,ab,kw
- 24 (Hoff G\* or Thiis-Evensen E\*).au. and (screen\* adj5 sigmoidoscopy).ti,ab,kw.
- 25 Telemark Polyp Study.ti,ab,kw.
- 26 Atkin W\*.au. and (screen\* adj5 sigmoidoscopy).ti,ab,kw
- 27 ((UK or U K or United Kingdom) and Flexible Sigmoidoscopy Trial).af.
- 28 (Schoen R\* or Weissfeld J\*).au. and (screen\* adj5 sigmoidoscopy).ti,ab,kw.
- 29 18 or 19 or 20 or 21 or 22 or 23 or 24 or 25 or 26 or 27 or 28
- 30 (J\*rgensen O\* or Kronborg O\*).au. and (f\*cal occult blood or FOBT).ti,ab,kw.
- 31 (Kewenter J\* or Brevinge H\*).au. and (f\*cal occult blood or FOBT).ti,ab,kw.
- 32 (Mandel J\* or Church T\*).au. and (f\*cal occult blood or FOBT).ti,ab,kw.
- 33 (Hardcastle JD or Scholefield JH).au. and (f\*cal occult blood or FOBT).ti,ab,kw.
- 34 (Niv Y or Tamir A).au. and (f\*cal occult blood or FOBT).ti,ab,kw.
- 35 (Malila N\* or Paimela H\*).au. and (f\*cal occult blood test or FOBT).ti,ab,kw.
- 36 (Zheng S\* or Zhang S\*).au. and colorectal cancer.ti,ab,kw. and screen\*.ti,ab,kw.
- 37 30 or 31 or 32 or 33 or 34 or 35 or 36

38 (Chen JG or Zhu YR).au. and (liver cancer or hepatoma or hepatocellular).ti,ab,kw. and screen\*.ti,ab,kw.

39 (Sherman M or Lee C).au. and (liver cancer or hepatoma or hepatocellular).ti,ab,kw. and screen\*.ti,ab,kw.

40 (Yang B or Zhang B\*).au. and (liver cancer or hepatoma or hepatocellular).ti,ab,kw. and screen\*.ti,ab,kw.

41 38 or 39 or 40

42 DANTE.ti,ab,kw,au. and (lung or screen\*).ti,ab,kw.

43 (Infante M\* or Ravasi G\*).au. and lung cancer.ti,ab,kw. and screen\*.ti,ab,kw.

44 (DLCST or Danish Lung Cancer Screening Trial).ti,ab,kw,au.

45 (Pedersen J\* or Dirksen A\*).au. and lung cancer.ti,ab,kw. and screen\*.ti,ab,kw.

46 ITALUNG.ti,ab,kw,au.

47 (Pegna A\* or Paci E\*).au. and lung cancer.ti,ab,kw. and screen\*.ti,ab,kw.

48 (LUSI or "Lung Cancer Screening Intervention trial").ti,ab,kw,au.

49 (Becker N\* or Delorme S\*).au. and lung cancer.ti,ab,kw. and screen\*.ti,ab,kw.

50 Multicentric Italian Lung Detection.ti,ab,kw,au. or MILD.au. or (MILD and (lung adj2 screen\*).ti,ab.

51 (Marchiano A\* or Pastorino U\*).au. and lung cancer.ti,ab,kw. and screen\*.ti,ab,kw.

52 (NELSON.ti,ab,kw,au. and (lung or screen\*).ti,ab,kw.) or ("Dutch-Belgian randomized lung cancer screening trial" or "Nederlands-Leuvens Longkanker Screenings Onderzoek" or "Dutch Belgian randomized lung cancer screening trial" or "Nederlands Leuvens Longkanker Screenings Onderzoek").ti,ab,kw,au.

53 (de Koning R\* or van Klaveren R\*).au. and lung cancer.ti,ab,kw. and screen\*.ti,ab,kw.

54 (NLST or "National Lung Screening Trial").ti,ab,kw,au.

55 (Aberle D\* or Adams A\*).au. and lung cancer.ti,ab,kw. and screen\*.ti,ab,kw.

56 42 or 43 or 44 or 45 or 46 or 47 or 48 or 49 or 50 or 51 or 52 or 53 or 54 or 55

57 (Baines C\* or Miller AB).au. and mammog\*.ti,ab,kw.

58 (Alexander F\* or Chamberlain J ).au and mammog\*.ti,ab,kw.

59 (Bjurstam N\* or Nystrom L\*).au and mammog\*.ti,ab,kw.

60 (Andersson I\* or Janzon L).au. and mammog\*.ti,ab,kw.

61 (Shapiro S or Strax P).au and mammog\*.ti,ab,kw

62 (Arnesson LG or Fagerberg G).au and mammog\*.ti,ab,kw

63 (Frisell J\* or Lindbrink E).au and mammog\*.ti,ab,kw

64 (Tabar L\* or Duffy S\* ).au and mammog\*.ti,ab,kw

65 (Moss S\* or Cuckle H).au and mammog\*.ti,ab,kw

66 57 or 58 or 59 or 60 or 61 or 62 or 63 or 64 or 65

67 (Sankaranarayanan R or Ramadas K).au. and oral cancer.ti,ab,kw. and screen\*.ti,ab,kw.

68 (Kobayashi H\* or Kitanaka T\*).au. and ovarian cancer.ti,ab,kw. and screen\*.ti,ab,kw.

69 (UK Collaborative Trial of Ovarian Cancer Screening or UKCTOCS).af.

70 (Menon U\* or Jacobs I\*).au. and ovarian cancer.ti,ab,kw. and screen\*.ti,ab,kw.

71 (Buys S\* or Partridge E\*).au. and ovarian cancer.ti,ab,kw. and screen\*.ti,ab,kw.

72 68 or 69 or 70 or 71

73 (ERSPC or European Randomised Study of Screening for Prostate Cancer).af.

74 (Schroder F\* or Hugosson J\*).au and prostate cancer.ti,ab,kw. and screen\*.ti,ab,kw.

75 (Sandblom G\* or Varenhorst E\*).au. and prostate cancer.ti,ab,kw. and screen\*.ti,ab,kw.

76 (Labrie F\* or Levesque J\*).au. and prostate cancer.ti,ab,kw. and screen\*.ti,ab,kw.

77 (Kjellman A\* or Gustafsson O\*).au. and prostate cancer.ti,ab,kw. and screen\*.ti,ab,kw.

78 (Comparison Arm for ProtecT or (prostate testing for cancer and treatment)).ti,ab.



79 Protect.ti,ab,kw,au. and prostate.ti,ab,kw. and screen\*.ti,ab,kw.  
80 (Martin R\* or Hamdy F\*).au and prostate cancer.ti,ab,kw. and screen\*.ti,ab,kw.  
81 (Andriole G\* or Crawford E\*).au and prostate cancer.ti,ab,kw. and screen\*.ti,ab,kw.  
82 73 or 74 or 75 or 76 or 77 or 78 or 79 or 80 or 81  
83 (Prostate, Lung, Colorectal and Ovarian).ti,ab,kw. or PLCO.ti,ab,kw,au.  
84 7 or 17 or 29 or 37 or 41 or 56 or 66 or 67 or 72 or 82 or 83

For Ovid MEDLINE and Ovid MEDLINE In-process & other non-indexed citations

85 comment on.cm. or systematic review.ti. or literature review.ti. or editorial.pt. or letter.pt. or  
meta-analysis.pt. or news.pt. or review.pt. or case reports.pt.  
86 84 not 85

For EMBASE

85 (comment or systematic review or literature review or editorial or meta-analysis or case  
report).ti. or editorial.pt. or letter.pt. or meta-analysis.pt. or news.pt. or review.pt. or case reports.pt.  
or (conference-proceedings or report or book).pt.  
86 84 not 85
