# Supplementary material for: Quantification of harms in cancer screening trials: literature review
Source: PubMed Central journal article supplement — BMJ. 2013 Sep 16;347:f5334. doi: 10.1136/bmj.f5334 (PMC4793399; doi:10.1136/bmj.f5334), 2013-09-16
Supplement: helb011664.ww3_default.pdf [file helb011664.ww3_default.pdf]

## **Appendix 3: References included in the analyses [posted as supplied by author]**

### **Eligible articles for the main analyses**

#### **Screening for breast cancer with breast examination**

##### ***Cairo***

SR1. Boulos S, Gadallah M, Neguib S, Essam E, Youssef A, Costa A, et al. Breast screening in the emerging world: high prevalence of breast cancer in Cairo. *Breast*. 2005 Oct;14(5):340–6.

##### ***Kerala***

SR2. Sankaranarayanan R, Ramadas K, Thara S, Muwonge R, Prabhakar J, Augustine P, et al. Clinical breast examination: preliminary results from a cluster randomized controlled trial in India. *J. Natl. Cancer Inst.* 2011 Oct 5;103(19):1476–80.

##### ***Mumbai***

SR3. Dinshaw K, Mishra G, Shastri S, Badwe R, Kerkar R, Ramani S, et al. Determinants of compliance in a cluster randomised controlled trial on screening of breast and cervix cancer in mumbai, India. 2. Compliance to referral and treatment. *Oncology*. 2007;73(3-4):154–61.

SR4. Dinshaw K, Mishra G, Shastri S, Badwe R, Kerkar R, Ramani S, et al. Determinants of compliance in a cluster randomised controlled trial on screening of breast and cervix cancer in Mumbai, India. 1. Compliance to screening. *Oncology*. 2007;73(3-4):145–53.

SR5. Mitra I, Mishra GA, Singh S, Aranke S, Notani P, Badwe R, et al. A cluster randomized, controlled trial of breast and cervix cancer screening in Mumbai, India: methodology and interim results after three rounds of screening. *Int. J. Cancer*. 2010 Feb 15;126(4):976–84.

##### ***Russia***

SR6. Semiglazov VF, Moiseenko VM. Breast self-examination for the early detection of breast cancer: a USSR/WHO controlled trial in Leningrad. *Bull. World Health Organ*. 1987;65(3):391–6.

SR7. Semiglazov VF, Moiseyenko VM, Bavli JL, Migmanova NS, Seleznyov NK, Popova RT, et al. The role of breast self-examination in early breast cancer detection (results of the 5-years USSR/WHO randomized study in Leningrad). *Eur. J. Epidemiol*. 1992 Jul;8(4):498–502.

SR8. Semiglazov VF, Moiseyenko VM, Manikhas AG, Protsenko SA, Kharikova RS, Ivanov VG. Role of breast self-examination in early detection of breast cancer: Russia/WHO prospective randomized trial in St.Petersburg. *Cancer Strategy*. 1999;1:145–51.

##### ***Shanghai***

SR9. Thomas DB, Gao DL, Self SG, Allison CJ, Tao Y, Mahloch J, et al. Randomized trial of breast self-examination in Shanghai: methodology and preliminary results. *J. Natl. Cancer Inst.* 1997 Mar 5;89(5):355–65.

SR10. Thomas DB, Gao DL, Ray RM, Wang WW, Allison CJ, Chen FL, et al. Randomized trial of breast self-examination in Shanghai: final results. *J. Natl. Cancer Inst.* 2002 Oct 2;94(19):1445–57.

## Screening for lung cancer with CT scans

### ***Detection and Screening of Early Lung Cancer by Novel Imaging Technology and Molecular Essay (DANTE)***

- SR11. Infante M, Lutman FR, Cavuto S, Brambilla G, Chiesa G, Passera E, et al. Lung cancer screening with spiral CT: baseline results of the randomized DANTE trial. *Lung Cancer*. 2008 Mar;59(3):355–63.
- SR12. Infante M, Cavuto S, Lutman FR, Brambilla G, Chiesa G, Ceresoli G, et al. A randomized study of lung cancer screening with spiral computed tomography: three-year results from the DANTE trial. *Am. J. Respir. Crit. Care Med*. 2009 Sep 1;180(5):445–53.
- SR13. Infante M, Chiesa G, Solomon D, Morengi E, Passera E, Lutman FR, et al. Surgical procedures in the DANTE trial, a randomized study of lung cancer early detection with spiral computed tomography: comparative analysis in the screening and control arm. *J Thorac Oncol*. 2011 Feb;6(2):327–35.

### ***Danish Lung Cancer Screening Trial (DLCST)***

- SR14. Ashraf H, Tønnesen P, Holst Pedersen J, Dirksen A, Thorsen H, Døssing M. Effect of CT screening on smoking habits at 1-year follow-up in the Danish Lung Cancer Screening Trial (DLCST). *Thorax*. 2009 May;64(5):388–92.
- SR15. Aggestrup LM, Hestbech MS, Siersma V, Pedersen JH, Brodersen J. Psychosocial consequences of allocation to lung cancer screening: a randomised controlled trial. *BMJ Open*. 2012;2(2):e000663.
- SR16. Kaerlev L, Iachina M, Pedersen JH, Green A, Nørgård BM. CT-Screening for lung cancer does not increase the use of anxiolytic or antidepressant medication. *BMC Cancer*. 2012;12:188.
- SR17. Saghir Z, Dirksen A, Ashraf H, Bach KS, Brodersen J, Clementsen PF, et al. CT screening for lung cancer brings forward early disease. The randomised Danish Lung Cancer Screening Trial: status after five annual screening rounds with low-dose CT. *Thorax* 2012 Jan 27.
- SR18. Petersen RH, Hansen HJ, Dirksen A, Pedersen JH. Lung cancer screening and video-assisted thoracic surgery. *J Thorac Oncol*. 2012 Jun;7(6):1026–31.

### ***Multicentric Italian Lung Detection Trial (MILD)***

- SR19. Pastorino U, Rossi M, Rosato V, Marchianò A, Sverzellati N, Morosi C, et al. Annual or biennial CT screening versus observation in heavy smokers: 5-year results of the MILD trial. *Eur. J. Cancer Prev*. 2012 May;21(3):308–15.

### ***Nederlands Leuvens Longkanker Screenings Onderzoek (NELSON) / Dutch Belgian randomized lung cancer screening trial***

- SR20. Van der Aalst CM, Van Klaveren RJ, Van den Bergh KAM, Willemsen MC, De Koning HJ. The impact of a lung cancer computed tomography screening result on smoking abstinence. *European Respiratory Journal*. 2010 Dec 9;37:1466–73.
- SR21. Van den Bergh KAM, Essink-Bot ML, Borsboom GJJM, Scholten ET, Van Klaveren RJ, De Koning HJ. Long-term effects of lung cancer computed tomography screening on health-related quality of life: the NELSON trial. *Eur. Respir. J*. 2011 Jul;38(1):154–61.

### ***National Lung Screening Trial (NLST)***

- SR22. Aberle DR, Adams AM, Berg CD, Clapp JD, Clingan KL, Gareen IF, et al. Baseline characteristics of participants in the randomized national lung screening trial. *J. Natl. Cancer Inst.* 2010 Dec 1;102(23):1771–9.
- SR23. The National Lung Screening Trial Research Team. Reduced Lung-Cancer Mortality with Low-Dose Computed Tomographic Screening. *N Engl J Med.* 2011 Jun;365(5):395–409.

### **Screening for lung cancer with chest X-ray**

#### ***Czech***

- SR24. Kubík A. [Risk groups and effective x-ray screening frequency of bronchial cancer]. *Z Erkr Atmungsorgane.* 1983;160(1):18–25.
- SR25. Kubík A, Polák J. Lung cancer detection. Results of a randomized prospective study in Czechoslovakia. *Cancer.* 1986 Jun 15;57(12):2427–37.
- SR26. Kubík A, Haerting J. Survival and mortality in a randomized study of lung cancer detection. *Neoplasma.* 1990;37(4):467–75.
- SR27. Kubik A, Parkin DM, Khlát M, Erban J, Polak J, Adamec M. Lack of benefit from semi-annual screening for cancer of the lung: follow-up report of a randomized controlled trial on a population of high-risk males in Czechoslovakia. *Int. J. Cancer.* 1990 Jan 15;45(1):26–33.
- SR28. Kubík AK, Parkin DM, Zatloukal P. Czech Study on Lung Cancer Screening: post-trial follow-up of lung cancer deaths up to year 15 since enrollment. *Cancer.* 2000 Dec 1;89(11 Suppl):2363–8.

#### ***Erfurt***

- SR29. Wilde J Sr, Dürschmied H, Dubitzky J, Lorenz H, Niegsch G, Schmidt H, et al. [Effectiveness of photofluorography screening studies in the early detection of bronchial carcinoma]. *Z Erkr Atmungsorgane.* 1983;160(2):128–41.
- SR30. Wilde J. A 10 year follow-up of semi-annual screening for early detection of lung cancer in the Erfurt County, GDR. *Eur. Respir. J.* 1989 Jul;2(7):656–62.

#### ***Johns Hopkins***

- SR31. Levin ML, Tockman MS, Frost JK, Ball WC Jr. Lung cancer mortality in males screened by chest X-ray and cytologic sputum examination: a preliminary report. *Recent Results Cancer Res.* 1982;82:138–46.
- SR32. Frost JK, Ball WC Jr, Levin ML, Tockman MS, Baker RR, Carter D, et al. Early lung cancer detection: results of the initial (prevalence) radiologic and cytologic screening in the Johns Hopkins study. *Am. Rev. Respir. Dis.* 1984 Oct;130(4):549–54.

#### ***Kaiser Permanente***

- SR33. Dales LG, Friedman GD, Ramcharan S, Siegelau AB, Campbell BA, Feldman R, et al. Multiphasic checkup evaluation study. 3. Outpatient clinic utilization, hospitalization, and mortality experience after seven years. *Prev Med.* 1973 Jun;2(2):221–35.
- SR34. Dales LG, Friedman GD, Collen MF. Evaluating periodic multiphasic health checkups: a controlled trial. *J Chronic Dis.* 1979;32(5):385–404.

SR35. Friedman GD, Collen MF, Fireman BH. Multiphasic Health Checkup Evaluation: a 16-year follow-up. *J Chronic Dis.* 1986;39(6):453–63.

#### ***Memorial Sloan Kettering***

SR36. Melamed M, Flehinger B, Miller D, Osborne R, Zaman M, McGinnis C, et al. Preliminary report of the lung cancer detection program in New York. *Cancer.* 1977 Feb;39(2):369–82.

SR37. Melamed MR, Flehinger BJ, Zaman MB, Heelan RT, Perchick WA, Martini N. Screening for early lung cancer. Results of the Memorial Sloan-Kettering study in New York. *Chest.* 1984 Jul;86(1):44–53.

SR38. Flehinger BJ, Melamed MR, Zaman MB, Heelan RT, Perchick WB, Martini N. Early lung cancer detection: results of the initial (prevalence) radiologic and cytologic screening in the Memorial Sloan-Kettering study. *Am. Rev. Respir. Dis.* 1984 Oct;130(4):555–60.

SR39. Melamed MR, Flehinger BJ. Detection of lung cancer: highlights of the Memorial Sloan-Kettering Study in New York City. *Schweiz Med Wochenschr.* 1987 Sep 26;117(39):1457–63.

SR40. Melamed MR, Flehinger BJ, Zaman MB. Impact of early detection on the clinical course of lung cancer. *Surg. Clin. North Am.* 1987 Oct;67(5):909–24.

#### ***Mayo Lung Project***

SR41. Fontana RS, Sanderson DR, Woolner LB, Miller WE, Bernatz PE, Payne WS, et al. The Mayo Lung Project for early detection and localization of bronchogenic carcinoma: a status report. *Chest.* 1975 May;67(5):511–22.

SR42. Neel HB 3rd, Sanderson DR, Fontana RS, Taylor WF, Woolner LB. Sputum cytologic diagnosis of upper respiratory tract cancer. Second report. *Ann. Otol. Rhinol. Laryngol.* 1981 Aug;90(4 Pt 1):312–5.

SR43. Sanderson D, Fontana R. Results of Mayo lung project: an interim report. *Recent Results Cancer Res.* 1982;82:179–86.

SR44. Fontana RS, Sanderson DR, Woolner LB, Taylor WF, Miller WE, Muhm JR. Lung cancer screening: the Mayo program. *J Occup Med.* 1986 Aug;28(8):746–50.

SR45. Fontana RS, Sanderson DR, Woolner LB, Taylor WF, Miller WE, Muhm JR, et al. Screening for lung cancer. A critique of the Mayo Lung Project. *Cancer.* 1991 Feb 15;67(4 Suppl):1155–64.

SR46. Marcus PM, Bergstralh EJ, Fagerstrom RM, Williams DE, Fontana R, Taylor WF, et al. Lung cancer mortality in the Mayo Lung Project: impact of extended follow-up. *J. Natl. Cancer Inst.* 2000 Aug 16;92(16):1308–16.

SR47. Marcus PM, Bergstralh EJ, Zweig MH, Harris A, Offord KP, Fontana RS. Extended lung cancer incidence follow-up in the Mayo Lung Project and overdiagnosis. *J. Natl. Cancer Inst.* 2006 Jun 7;98(11):748–56.

SR48. Shi L, Iguchi MY. “Risk homeostasis” or “teachable moment”? the interaction between smoking behavior and lung cancer screening in the Mayo Lung Project. *Tob Induc Dis.* 2011;9(1):2.

#### ***North London***

SR49. Brett GZ. The presymptomatic diagnosis of lung cancer. Proc. R. Soc. Med. 1966 Nov;59(11 Part 2):1208–14.

SR50. Brett GZ. The value of lung cancer detection by six-monthly chest radiographs. Thorax. 1968 Jul;23(4):414–20.

#### ***Prostate, Lung, Colorectal and Ovarian Cancer Screening Trial (PLCO)***

SR51. Oken MM, Hocking WG, Kvale PA, Andriole GL, Buys SS, Church TR, et al. Screening by Chest Radiograph and Lung Cancer Mortality. JAMA: The Journal of the American Medical Association. 2011 Oct 26.

### **Screening for colorectal cancer with sigmoidoscopy or colonoscopy**

#### ***Kaiser Permanente***

SR52. Selby JV, Friedman GD, Collen MF. Sigmoidoscopy and mortality from colorectal cancer: the Kaiser Permanente Multiphasic Evaluation Study. J Clin Epidemiol. 1988;41(5):427–34.

#### ***Norwegian Colorectal Cancer Prevention screening study (NORCCAP)***

SR53. Larsen IK, Grotmol T, Almendingen K, Hoff G. Lifestyle characteristics among participants in a Norwegian colorectal cancer screening trial. Eur. J. Cancer Prev. 2006 Feb;15(1):10–9.

SR54. Larsen IK, Grotmol T, Almendingen K, Hoff G. Impact of colorectal cancer screening on future lifestyle choices: a three-year randomized controlled trial. Clin. Gastroenterol. Hepatol. 2007 Apr;5(4):477–83.

SR55. Hoff G, Grotmol T, Skovlund E, Bretthauer M. Risk of colorectal cancer seven years after flexible sigmoidoscopy screening: randomised controlled trial. BMJ. 2009;338:b1846.

#### ***Prostate, Lung, Colorectal and Ovarian Cancer Screening Trial (PLCO)***

SR56. Schoen RE, Pinsky PF, Weissfeld JL, Yokochi LA, Church T, Laiyemo AO, et al. Colorectal-cancer incidence and mortality with screening flexible sigmoidoscopy. N. Engl. J. Med. 2012 Jun 21;366(25):2345–57.

#### ***Screening for Colon Rectum trial (SCORE)***

SR57. Segnan N, Armaroli P, Bonelli L, Risio M, Sciallero S, Zappa M, et al. Once-only sigmoidoscopy in colorectal cancer screening: follow-up findings of the Italian Randomized Controlled Trial--SCORE. J. Natl. Cancer Inst. 2011 Sep 7;103(17):1310–22.

#### ***Spain***

SR58. Quintero E, Castells A, Bujanda L, Cubiella J, Salas D, Lanás Á, et al. Colonoscopy versus fecal immunochemical testing in colorectal-cancer screening. N. Engl. J. Med. 2012 Feb 23;366(8):697–706.

#### ***Telemark Polyp Study***

SR59. Hoff G, Sauar J, Vatn MH, Larsen S, Langmark F, Moen IE, et al. Polypectomy of adenomas in the prevention of colorectal cancer: 10 years' follow-up of the Telemark Polyp Study I. A prospective, controlled population study. Scand. J. Gastroenterol. 1996 Oct;31(10):1006–10.

- SR60. Thiis-Evensen E, Hoff GS, Sauar J, Langmark F, Majak BM, Vatn MH. Population-based surveillance by colonoscopy: effect on the incidence of colorectal cancer. Telemark Polyp Study I. *Scand. J. Gastroenterol.* 1999 Apr;34(4):414–20.
- SR61. Hoff G, Thiis-Evensen E, Grotmol T, Sauar J, Vatn MH, Moen IE. Do undesirable effects of screening affect all-cause mortality in flexible sigmoidoscopy programmes? Experience from the Telemark Polyp Study 1983-1996. *Eur. J. Cancer Prev.* 2001 Apr;10(2):131–7.

#### ***U.K. Flexible Sigmoidoscopy Study***

- SR62. Atkin WS, Hart A, Edwards R, McIntyre P, Aubrey R, Wardle J, et al. Uptake, yield of neoplasia, and adverse effects of flexible sigmoidoscopy screening. *Gut.* 1998 Apr;42(4):560–5.
- SR63. Atkin WS, Cook CF, Cuzick J, Edwards R, Northover JMA, Wardle J. Single flexible sigmoidoscopy screening to prevent colorectal cancer: baseline findings of a UK multicentre randomised trial. *Lancet.* 2002 Apr 13;359(9314):1291–300.
- SR64. Atkin WS, Edwards R, Kralj-Hans I, Wooldrage K, Hart AR, Northover JMA, et al. Once-only flexible sigmoidoscopy screening in prevention of colorectal cancer: a multicentre randomised controlled trial. *Lancet.* 2010 May 8;375(9726):1624–33.

### **Screening for colorectal cancer with faecal occult blood tests**

#### ***Finland***

- SR65. Malila N, Oivanen T, Malminiemi O, Hakama M. Test, episode, and programme sensitivities of screening for colorectal cancer as a public health policy in Finland: experimental design. *BMJ.* 2008;337:a2261.
- SR66. Paimela H, Malila N, Palva T, Hakulinen T, Vertio H, Järvinen H. Early detection of colorectal cancer with faecal occult blood test screening. *Br J Surg.* 2010 Oct;97(10):1567–71.

#### ***Funen***

- SR67. Kronborg O, Fenger C, Søndergaard O, Pedersen KM, Olsen J. Initial mass screening for colorectal cancer with fecal occult blood test. A prospective randomized study at Funen in Denmark. *Scand. J. Gastroenterol.* 1987 Aug;22(6):677–86.
- SR68. Kronborg O, Fenger C, Olsen J, Bech K, Søndergaard O. Repeated screening for colorectal cancer with fecal occult blood test. A prospective randomized study at Funen, Denmark. *Scand. J. Gastroenterol.* 1989 Jun;24(5):599–606.
- SR69. Kronborg O, Fenger C, Worm J, Pedersen SA, Hem J, Bertelsen K, et al. Causes of death during the first 5 years of a randomized trial of mass screening for colorectal cancer with fecal occult blood test. *Scand. J. Gastroenterol.* 1992;27(1):47–52.
- SR70. Bech K, Kronborg O. [Requirement of hospital beds in connection with screening for colorectal cancer. The first 5-years of a randomized population survey]. *Ugeskr. Laeg.* 1992 Mar 9;154(11):696–9.
- SR71. Kronborg O, Fenger C, Olsen J, Jørgensen OD, Søndergaard O. Randomised study of screening for colorectal cancer with faecal-occult-blood test. *Lancet.* 1996 Nov 30;348(9040):1467–71.

- SR72. Kronborg O, Fenger C, Olsen J, Jørgensen OD, Søndergaard O. [Randomized population study of screening for intestinal cancer with Hemoccult-II]. *Ugeskr. Laeg.* 1997 Aug 11;159(33):4977–81.
- SR73. Jørgensen OD, Kronborg O, Fenger C. A randomised study of screening for colorectal cancer using faecal occult blood testing: results after 13 years and seven biennial screening rounds. *Gut.* 2002 Jan;50(1):29–32.
- SR74. Kronborg O, Jørgensen OD, Fenger C, Rasmussen M. Randomized study of biennial screening with a faecal occult blood test: results after nine screening rounds. *Scand. J. Gastroenterol.* 2004 Sep;39(9):846–51.

#### ***Goteborg***

- SR75. Kewenter J, Björk S, Haglind E, Smith L, Svanvik J, Ahrén C. Screening and rescreening for colorectal cancer. A controlled trial of fecal occult blood testing in 27,700 subjects. *Cancer.* 1988 Aug 1;62(3):645–51.
- SR76. Kewenter J, Brevinge H, Engarås B, Haglind E, Ahrén C. Follow-up after screening for colorectal neoplasms with fecal occult blood testing in a controlled trial. *Dis. Colon Rectum.* 1994 Feb;37(2):115–9.
- SR77. Kewenter J, Brevinge H, Engarås B, Haglind E, Ahrén C. Results of screening, rescreening, and follow-up in a prospective randomized study for detection of colorectal cancer by fecal occult blood testing. Results for 68,308 subjects. *Scand. J. Gastroenterol.* 1994 May;29(5):468–73.
- SR78. Lindholm E, Berglund B, Haglind E, Kewenter J. Factors associated with participation in screening for colorectal cancer with faecal occult blood testing. *Scand. J. Gastroenterol.* 1995 Feb;30(2):171–6.
- SR79. Lindholm E, Brevinge H, Haglind E. Survival benefit in a randomized clinical trial of faecal occult blood screening for colorectal cancer. *Br J Surg.* 2008 Aug;95(8):1029–36.

#### ***Jianshan***

- SR80. Zheng S, Chen K, Liu X, Ma X, Yu H, Chen K, et al. Cluster randomization trial of sequence mass screening for colorectal cancer. *Dis. Colon Rectum.* 2003 Jan;46(1):51–8.

#### ***Minnesota***

- SR81. Mandel JS, Bond JH, Church TR, Snover DC, Bradley GM, Schuman LM, et al. Reducing mortality from colorectal cancer by screening for fecal occult blood. Minnesota Colon Cancer Control Study. *N. Engl. J. Med.* 1993 May 13;328(19):1365–71.
- SR82. Mandel JS, Church TR, Ederer F, Bond JH. Colorectal cancer mortality: effectiveness of biennial screening for fecal occult blood. *J. Natl. Cancer Inst.* 1999 Mar 3;91(5):434–7.
- SR83. Mandel JS, Church TR, Bond JH, Ederer F, Geisser MS, Mongin SJ, et al. The effect of fecal occult-blood screening on the incidence of colorectal cancer. *N. Engl. J. Med.* 2000 Nov 30;343(22):1603–7.

#### ***Nottingham***

- SR84. Hardcastle JD, Farrands PA, Balfour TW, Chamberlain J, Amar SS, Sheldon MG. Controlled trial of faecal occult blood testing in the detection of colorectal cancer. *Lancet.* 1983 Jul 2;2(8340):1–4.

- SR85. Hardcastle JD, Armitage NC, Chamberlain J, Balfour TW, Amar SS. A control trial of faecal occult blood screening for colorectal cancer: 2-year results. *Br J Surg*. 1985 Sep;72 Suppl:S69–71.
- SR86. Armitage NC, Hardcastle JD. Screening for colorectal cancer--the Nottingham experience. *Ann. Acad. Med. Singap*. 1987 Jul;16(3):432–6.
- SR87. Hardcastle JD, Thomas WM, Chamberlain J, Pye G, Sheffield J, James PD, et al. Randomised, controlled trial of faecal occult blood screening for colorectal cancer. Results for first 107,349 subjects. *Lancet*. 1989 May 27;1(8648):1160–4.
- SR88. Hardcastle JD, Chamberlain JO, Robinson MH, Moss SM, Amar SS, Balfour TW, et al. Randomised controlled trial of faecal-occult-blood screening for colorectal cancer. *Lancet*. 1996 Nov 30;348(9040):1472–7.
- SR89. Scholefield JH, Robinson MH, Mangham CM, Hardcastle JD. Screening for colorectal cancer reduces emergency admissions. *Eur J Surg Oncol*. 1998 Feb;24(1):47–50.
- SR90. Robinson MH, Hardcastle JD, Moss SM, Amar SS, Chamberlain JO, Armitage NC, et al. The risks of screening: data from the Nottingham randomised controlled trial of faecal occult blood screening for colorectal cancer. *Gut*. 1999 Oct;45(4):588–92.
- SR91. Robinson MH, Rodrigues VC, Hardcastle JD, Chamberlain JO, Mangham CM, Moss SM. Faecal occult blood screening for colorectal cancer at Nottingham: details of the verification process. *J Med Screen*. 2000;7(2):97–8.
- SR92. Scholefield JH, Moss S, Sufi F, Mangham CM, Hardcastle JD. Effect of faecal occult blood screening on mortality from colorectal cancer: results from a randomised controlled trial. *Gut*. 2002 Jun;50(6):840–4.
- SR93. Whynes DK, Mangham CM, Balfour TW, Scholefield JH. Analysis of deaths occurring within the Nottingham trial of faecal occult blood screening for colorectal cancer. *Gut*. 2010 Aug;59(8):1088–93.
- SR94. Scholefield JH, Moss SM, Mangham CM, Whynes DK, Hardcastle JD. Nottingham trial of faecal occult blood testing for colorectal cancer: a 20-year follow-up. *Gut*. 2012 Jul;61(7):1036–40.

### **Screening for liver cancer in Hepatitis B patients**

#### ***Chen***

- SR95. Chen J-G, Parkin DM, Chen Q-G, Lu J-H, Shen Q-J, Zhang B-C, et al. Screening for liver cancer: results of a randomised controlled trial in Qidong, China. *J Med Screen*. 2003;10(4):204–9.

#### ***Sherman***

- SR96. Sherman M, Peltekian KM, Lee C. Screening for hepatocellular carcinoma in chronic carriers of hepatitis B virus: incidence and prevalence of hepatocellular carcinoma in a North American urban population. *Hepatology*. 1995 Aug;22(2):432–8.

#### ***Yang***

- SR97. Yang B, Zhang B, Xu Y, Wang W, Shen Y, Zhang A, et al. Prospective study of early detection for primary liver cancer. *J. Cancer Res. Clin. Oncol*. 1997;123(6):357–60.



SR98. Zhang B-H, Yang B-H, Tang Z-Y. Randomized controlled trial of screening for hepatocellular carcinoma. *Journal of Cancer Research and Clinical Oncology* [Internet]. 2004 Mar 20 [cited 2012 Jan 26];130(7).

## **Screening for breast cancer with mammography**

### ***Canada***

SR99. Miller AB, To T, Baines CJ, Wall C. The Canadian National Breast Screening Study: update on breast cancer mortality. *J. Natl. Cancer Inst. Monographs*. 1997;(22):37–41.

### ***Canada A***

SR100. Miller AB, Baines CJ, To T, Wall C. Canadian National Breast Screening Study: 1. Breast cancer detection and death rates among women aged 40 to 49 years. *CMAJ*. 1992 Nov 15;147(10):1459–76.

SR101. Miller AB, To T, Baines CJ, Wall C. The Canadian National Breast Screening Study-1: breast cancer mortality after 11 to 16 years of follow-up. A randomized screening trial of mammography in women age 40 to 49 years. *Ann. Intern. Med.* 2002 Sep 3;137(5 Part 1):305–12.

### ***Canada B***

SR102. Miller AB, Baines CJ, To T, Wall C. Canadian National Breast Screening Study: 2. Breast cancer detection and death rates among women aged 50 to 59 years. *CMAJ*. 1992 Nov 15;147(10):1477–88.

SR103. Miller AB, To T, Baines CJ, Wall C. Canadian National Breast Screening Study-2: 13-year results of a randomized trial in women aged 50-59 years. *J. Natl. Cancer Inst.* 2000 Sep 20;92(18):1490–9.

### ***Edinburgh***

SR104. Roberts MM, Alexander FE, Anderson TJ, Chetty U, Donnan PT, Forrest P, et al. Edinburgh trial of screening for breast cancer: mortality at seven years. *Lancet*. 1990 Feb 3;335(8684):241–6.

SR105. Anderson TJ, Lamb J, Donnan P, Alexander FE, Huggins A, Muir BB, et al. Comparative pathology of breast cancer in a randomised trial of screening. *Br. J. Cancer*. 1991 Jul;64(1):108–13.

SR106. Alexander FE, Anderson TJ, Brown HK, Forrest AP, Hepburn W, Kirkpatrick AE, et al. The Edinburgh randomised trial of breast cancer screening: results after 10 years of follow-up. *Br. J. Cancer*. 1994 Sep;70(3):542–8.

SR107. Alexander FE. The Edinburgh Randomized Trial of Breast Cancer Screening. *J. Natl. Cancer Inst. Monographs*. 1997;(22):31–5.

SR108. Alexander FE, Anderson TJ, Brown HK, Forrest AP, Hepburn W, Kirkpatrick AE, et al. 14 years of follow-up from the Edinburgh randomised trial of breast-cancer screening. *Lancet*. 1999 Jun 5;353(9168):1903–8.

### ***Goteborg***

SR109. Bjurstam N, Björneld L, Warwick J, Sala E, Duffy SW, Nyström L, et al. The Gothenburg Breast Screening Trial. *Cancer*. 2003 May 15;97(10):2387–96.

### ***Goteborg A***

SR110. Bjurstam N, Björnelid L, Duffy SW, Smith TC, Cahlin E, Erikson O, et al. The Gothenburg Breast Cancer Screening Trial: preliminary results on breast cancer mortality for women aged 39-49. *J. Natl. Cancer Inst. Monographs*. 1997;(22):53-5.

SR111. Bjurstam N, Björnelid L, Duffy SW, Smith TC, Cahlin E, Eriksson O, et al. The Gothenburg breast screening trial: first results on mortality, incidence, and mode of detection for women ages 39-49 years at randomization. *Cancer*. 1997 Dec 1;80(11):2091-9.

#### ***Kopparberg***

SR112. Tabar L, Gad A, Holmberg L, Ljungquist U. Significant reduction in advanced breast cancer. Results of the first seven years of mammography screening in Kopparberg, Sweden. *Diagn Imaging Clin Med*. 1985;54(3-4):158-64.

#### ***Malmö I***

SR113. Andersson I, Andrén L, Hildell J, Linell F, Ljungqvist U, Pettersson H. Breast cancer screening with mammography: a population-based, randomized trial with mammography as the only screening mode. *Radiology*. 1979 Aug;132(2):273-6.

SR114. Andersson I. Radiographic screening for breast carcinoma. II. Prognostic considerations on the basis of a short-term follow-up. *Acta Radiol Diagn (Stockh)*. 1981;22(3A):227-33.

SR115. Andersson I. Breast cancer screening in Malmö. *Recent Results Cancer Res*. 1984;90:114-6.

SR116. Andersson I, Janzon L, Sigfússon BF. Mammographic breast cancer screening--a randomized trial in Malmö, Sweden. *Maturitas*. 1985 May;7(1):21-9.

SR117. Andersson I, Sigfússon BF. Screening for breast cancer in Malmö: a randomized trial. *Recent Results Cancer Res*. 1987;105:62-6.

SR118. Andersson I, Aspegren K, Janzon L, Landberg T, Lindholm K, Linell F, et al. Mammographic screening and mortality from breast cancer: the Malmö mammographic screening trial. *BMJ*. 1988 Oct 15;297(6654):943-8.

SR119. Zackrisson S, Andersson I, Janzon L, Manjer J, Garne JP. Rate of over-diagnosis of breast cancer 15 years after end of Malmö mammographic screening trial: follow-up study. *BMJ*. 2006 Mar 25;332(7543):689-92.

#### ***Malmö II***

SR120. Andersson I, Janzon L. Reduced breast cancer mortality in women under age 50: updated results from the Malmö Mammographic Screening Program. *J. Natl. Cancer Inst. Monographs*. 1997;(22):63-7.

#### ***New York***

SR121. Shapiro S, Strax P, Venet L. Evaluation of periodic breast cancer screening with mammography. Methodology and early observations. *JAMA*. 1966 Feb 28;195(9):731-8.

SR122. Strax P, Venet L, Shapiro S, Gross S. Mammography and clinical examination in mass screening for cancer of the breast. *Cancer*. 1967 Dec;20(12):2184-8.

SR123. Strax P, Venet L, Shapiro S, Gross S, Venet W. Breast cancer found on repetitive examination in mass screening. *Arch. Environ. Health*. 1970 Jun;20(6):758-63.

- SR124. Shapiro S, Strax P, Venet L. Periodic breast cancer screening in reducing mortality from breast cancer. *JAMA*. 1971 Mar 15;215(11):1777–85.
- SR125. Shapiro S, Strax P, Venet L, Venet W. Changes in 5-year breast cancer mortality in a breast cancer screening program. *Proc Natl Cancer Conf*. 1972;7:663–78.
- SR126. Strax P, Venet L, Shapiro S. Value of mammography in reduction of mortality from breast cancer in mass screening. *Am J Roentgenol Radium Ther Nucl Med*. 1973 Mar;117(3):686–9.
- SR127. Shapiro S. Evidence on screening for breast cancer from a randomized trial. *Cancer*. 1977 Jun;39(6 Suppl):2772–82.
- SR128. Shapiro S, Venet W, Strax P, Venet L, Roeser R. Ten- to fourteen-year effect of screening on breast cancer mortality. *J. Natl. Cancer Inst*. 1982 Aug;69(2):349–55.
- SR129. Shapiro S, Venet W, Strax P, Venet L, Roeser R. Selection, follow-up, and analysis in the Health Insurance Plan Study: a randomized trial with breast cancer screening. *Natl Cancer Inst Monogr*. 1985 May;67:65–74.
- SR130. Aron JL, Prorok PC. An analysis of the mortality effect in a breast cancer screening study. *Int J Epidemiol*. 1986 Mar;15(1):36–43.
- SR131. Habbema JD, Van Oortmarsen GJ, Van Putten DJ, Lubbe JT, Van der Maas PJ. Age-specific reduction in breast cancer mortality by screening: an analysis of the results of the Health Insurance Plan of Greater New York study. *J. Natl. Cancer Inst*. 1986 Aug;77(2):317–20.
- SR132. Shapiro S. Determining the efficacy of breast cancer screening. *Cancer*. 1989 May 15;63(10):1873–80.
- SR133. Shapiro S, Strax P, Venet L. Evaluation of periodic breast cancer screening with mammography: methodology and early observations. *CA Cancer J Clin*. 1990 Apr;40(2):111–25.
- SR134. Shapiro S. Periodic screening for breast cancer: the HIP Randomized Controlled Trial. *Health Insurance Plan. J. Natl. Cancer Inst. Monographs*. 1997;(22):27–30.

### ***Stockholm***

- SR135. Frisell J, Glas U, Hellström L, Somell A. Randomized mammographic screening for breast cancer in Stockholm. Design, first round results and comparisons. *Breast Cancer Res. Treat*. 1986;8(1):45–54.
- SR136. Frisell J, Eklund G, Hellström L, Glas U, Somell A. The Stockholm breast cancer screening trial--5-year results and stage at discovery. *Breast Cancer Res. Treat*. 1989 Jan;13(1):79–87.
- SR137. Frisell J, Eklund G, Hellström L, Lidbrink E, Rutqvist LE, Somell A. Randomized study of mammography screening--preliminary report on mortality in the Stockholm trial. *Breast Cancer Res. Treat*. 1991 Mar;18(1):49–56.
- SR138. Frisell J, Lidbrink E. The Stockholm Mammographic Screening Trial: Risks and benefits in age group 40-49 years. *J. Natl. Cancer Inst. Monographs*. 1997;(22):49–51.
- SR139. Frisell J, Lidbrink E, Hellström L, Rutqvist LE. Followup after 11 years--update of mortality results in the Stockholm mammographic screening trial. *Breast Cancer Res. Treat*. 1997 Sep;45(3):263–70.

### **Two County**

- SR140. Tabár L, Akerlund E, Gad A. Five-year experience with single-view mammography randomized controlled screening in Sweden. *Recent Results Cancer Res.* 1984;90:105–13.
- SR141. [Initial results from a randomized study in the counties of Kopparberg and Ostergötland (the WE project). Reduced mortality in breast cancer through health control with mammography]. *Nord Med.* 1985;100(6-7):175–8.
- SR142. Tabár L, Fagerberg CJ, Gad A, Baldetorp L, Holmberg LH, Gröntoft O, et al. Reduction in mortality from breast cancer after mass screening with mammography. Randomised trial from the Breast Cancer Screening Working Group of the Swedish National Board of Health and Welfare. *Lancet.* 1985 Apr 13;1(8433):829–32.
- SR143. Tabár L, Fagerberg G, Day NE, Holmberg L. What is the optimum interval between mammographic screening examinations? An analysis based on the latest results of the Swedish two-county breast cancer screening trial. *Br. J. Cancer.* 1987 May;55(5):547–51.
- SR144. Tabar L, Fagerberg G, Duffy SW, Day NE. The Swedish two county trial of mammographic screening for breast cancer: recent results and calculation of benefit. *J Epidemiol Community Health.* 1989 Jun;43(2):107–14.
- SR145. Tabár L, Fagerberg G, Duffy SW, Day NE. [The WE project: mammography significantly decreases breast cancer mortality]. *Lakartidningen.* 1990 Jan 10;87(1-2):36–9.
- SR146. Tabar L, Fagerberg G, Duffy SW, Day NE, Gad A, Gröntoft O. Update of the Swedish two-county program of mammographic screening for breast cancer. *Radiol. Clin. North Am.* 1992 Jan;30(1):187–210.
- SR147. Tabar L, Duffy SW, Burhenne LW. New Swedish breast cancer detection results for women aged 40-49. *Cancer.* 1993 Aug 15;72(4 Suppl):1437–48.
- SR148. Chen HH, Tabar L, Fagerberg G, Duffy SW. Effect of breast cancer screening after age 65. *J Med Screen.* 1995;2(1):10–4.
- SR149. Tabar L, Fagerberg G, Chen HH, Duffy SW, Gad A. Screening for breast cancer in women aged under 50: mode of detection, incidence, fatality, and histology. *J Med Screen.* 1995;2(2):94–8.
- SR150. Tabar L, Fagerberg G, Chen HH, Duffy SW, Smart CR, Gad A, et al. Efficacy of breast cancer screening by age. New results from the Swedish Two-County Trial. *Cancer.* 1995 May 15;75(10):2507–17.
- SR151. Tabar L, Vitak B, Chen HH, Prevost TC, Duffy SW. Update of the Swedish Two-County Trial of breast cancer screening: histologic grade-specific and age-specific results. *Swiss Surg.* 1999;5(5):199–204.
- SR152. Tabár L, Duffy SW, Vitak B, Chen HH, Prevost TC. The natural history of breast carcinoma: what have we learned from screening? *Cancer.* 1999 Aug 1;86(3):449–62.
- SR153. Tabár L, Vitak B, Chen HH, Duffy SW, Yen MF, Chiang CF, et al. The Swedish Two-County Trial twenty years later. Updated mortality results and new insights from long-term follow-up. *Radiol. Clin. North Am.* 2000 Jul;38(4):625–51.

- SR154. Duffy SW, Tabar L, Vitak B, Yen MF, Warwick J, Smith RA, et al. The Swedish Two-County Trial of mammographic screening: cluster randomisation and end point evaluation. *Ann. Oncol.* 2003 Aug;14(8):1196–8.
- SR155. Tabar L, Vitak B, Yen MFA, Chen HHT, Smith RA, Duffy SW. Number needed to screen: lives saved over 20 years of follow-up in mammographic screening. *J Med Screen.* 2004;11(3):126–9.
- SR156. Tabár L, Vitak B, Chen TH-H, Yen AM-F, Cohen A, Tot T, et al. Swedish two-county trial: impact of mammographic screening on breast cancer mortality during 3 decades. *Radiology.* 2011 Sep;260(3):658–63.

#### ***U.K. Age Trial***

- SR157. Anderson TJ, Waller M, Ellis IO, Bobrow L, Moss S. Influence of annual mammography from age 40 on breast cancer pathology. *Hum. Pathol.* 2004 Oct;35(10):1252–9.
- SR158. Moss S, Thomas I, Evans A, Thomas B, Johns L. Randomised controlled trial of mammographic screening in women from age 40: results of screening in the first 10 years. *Br. J. Cancer.* 2005 Mar 14;92(5):949–54.
- SR159. Moss SM, Cuckle H, Evans A, Johns L, Waller M, Bobrow L. Effect of mammographic screening from age 40 years on breast cancer mortality at 10 years' follow-up: a randomised controlled trial. *Lancet.* 2006 Dec 9;368(9552):2053–60.

#### ***Östergötland***

- SR160. Fagerberg G, Baldetorp L, Gröntoft O, Lundström B, Månson JC, Nordenskjöld B. Effects of repeated mammographic screening on breast cancer stage distribution. Results from a randomised study of 92 934 women in a Swedish county. *Acta Radiol Oncol.* 1985 Dec;24(6):465–73.

### **Screening for oral cancer (several screening tests)**

#### ***Sankaranarayanan***

- SR161. Sankaranarayanan R, Mathew B, Jacob BJ, Thomas G, Somanathan T, Pisani P, et al. Early findings from a community-based, cluster-randomized, controlled oral cancer screening trial in Kerala, India. The Trivandrum Oral Cancer Screening Study Group. *Cancer.* 2000 Feb 1;88(3):664–73.
- SR162. Ramadas K, Sankaranarayanan R, Jacob BJ, Thomas G, Somanathan T, Mahé C, et al. Interim results from a cluster randomized controlled oral cancer screening trial in Kerala, India. *Oral Oncol.* 2003 Sep;39(6):580–8.
- SR163. Sankaranarayanan R, Ramadas K, Thomas G, Muwonge R, Thara S, Mathew B, et al. Effect of screening on oral cancer mortality in Kerala, India: a cluster-randomised controlled trial. *Lancet.* 2005 Jun 4;365(9475):1927–33.
- SR164. Subramanian S, Sankaranarayanan R, Bapat B, Somanathan T, Thomas G, Mathew B, et al. Cost-effectiveness of oral cancer screening: results from a cluster randomized controlled trial in India. *Bull. World Health Organ.* 2009 Mar;87(3):200–6.

### **Screening for ovarian cancer (several screening tests)**

#### ***Jacobs***

SR165. Jacobs IJ, Skates SJ, MacDonald N, Menon U, Rosenthal AN, Davies AP, et al. Screening for ovarian cancer: a pilot randomised controlled trial. *Lancet*. 1999 Apr 10;353(9160):1207–10.

***Prostate, Lung, Colorectal and Ovarian Cancer Screening Trial (PLCO)***

SR166. Buys SS, Partridge E, Black A, Johnson CC, Lamerato L, Isaacs C, et al. Effect of screening on ovarian cancer mortality: the Prostate, Lung, Colorectal and Ovarian (PLCO) Cancer Screening Randomized Controlled Trial. *JAMA*. 2011 Jun 8;305(22):2295–303.

***Shizouka***

SR167. Kobayashi H, Yamada Y, Sado T, Sakata M, Yoshida S, Kawaguchi R, et al. A randomized study of screening for ovarian cancer: a multicenter study in Japan. *Int. J. Gynecol. Cancer*. 2008 Jun;18(3):414–20.

**Screening for prostate cancer (several screening tests)**

***European Randomized Study of Screening for Prostate Cancer (ERSPC)***

SR168. Hugosson J, Aus G, Lilja H, Lodding P, Pihl CG, Pileblad E. Prostate specific antigen based biennial screening is sufficient to detect almost all prostate cancers while still curable. *J. Urol*. 2003 May;169(5):1720–3.

SR169. Berenguer A, Luján M, Páez A, Santonja C, Pascual T. The Spanish contribution to the European Randomized Study of Screening for Prostate Cancer. *BJU Int*. 2003 Dec;92 Suppl 2:33–8.

SR170. Nelen V, Thys G, Neels H, Neetens I, Coebergh JW, Dourcy-Belle-Rose B, et al. ERSPC: features and preliminary results from the Antwerp study centre. *BJU Int*. 2003 Dec;92 Suppl 2:17–21.

SR171. Postma R, Van Leenders AGJLH, Roobol MJ, Schröder FH, Van der Kwast TH. Tumour features in the control and screening arm of a randomized trial of prostate cancer. *Eur. Urol*. 2006 Jul;50(1):70–5.

SR172. Roemeling S, Roobol MJ, Gosselaar C, Schröder FH. Biochemical progression rates in the screen arm compared to the control arm of the Rotterdam Section of the European Randomized Study of Screening for Prostate Cancer (ERSPC). *Prostate*. 2006 Jul 1;66(10):1076–81.

SR173. Luján M, Páez A, Pascual C, Angulo J, Miravalles E, Berenguer A. Extent of prostate-specific antigen contamination in the Spanish section of the European Randomized Study of Screening for Prostate Cancer (ERSPC). *Eur. Urol*. 2006 Dec;50(6):1234–1240; discussion 1239–1240.

SR174. Aus G, Bergdahl S, Lodding P, Lilja H, Hugosson J. Prostate cancer screening decreases the absolute risk of being diagnosed with advanced prostate cancer--results from a prospective, population-based randomized controlled trial. *Eur. Urol*. 2007 Mar;51(3):659–64.

SR175. Torres Zambrano G, Lujan Galán M, Pascual Mateo C, García Tello A, Rodríguez N, Berenguer Sánchez A. [Preliminary data of the Spanish contribution to the European Randomized Study on Screening of Prostate Cancer (ERSPC)]. *Arch. Esp. Urol*. 2007 Sep;60(7):737–43.

SR176. Schröder FH, Hugosson J, Roobol MJ, Tammela TLJ, Ciatto S, Nelen V, et al. Screening and prostate-cancer mortality in a randomized European study. *N. Engl. J. Med*. 2009 Mar 26;360(13):1320–8.

SR177. Bangma C., Roobol M., De Koning H., Denis L., Schroder F. Screening reduces deaths from prostate cancer. *Huisarts en Wetenschap*. 2009 Jun;52(7):352–7.

- SR178. Jegu J, Tretarre B, Grosclaude P, Rebillard X, Bataille V, Malavaud B, et al. [Results and participation factors to the European Randomized study of Screening for Prostate Cancer (ERSPC) with Prostate Specific Antigen: French departments of Tarn and Hérault]. *Prog. Urol.* 2009 Jul;19(7):487–98.
- SR179. Roobol MJ, Kerkhof M, Schröder FH, Cuzick J, Sasieni P, Hakama M, et al. Prostate cancer mortality reduction by prostate-specific antigen-based screening adjusted for nonattendance and contamination in the European Randomised Study of Screening for Prostate Cancer (ERSPC). *Eur. Urol.* 2009 Oct;56(4):584–91.
- SR180. Van Leeuwen PJ, Kranse R, Hakulinen T, Roobol MJ, De Koning HJ, Bangma CH, et al. Disease-specific mortality may underestimate the total effect of prostate cancer screening. *J Med Screen.* 2010;17(4):204–10.
- SR181. Hugosson J, Carlsson S, Aus G, Bergdahl S, Khatami A, Lodding P, et al. Mortality results from the Göteborg randomised population-based prostate-cancer screening trial. *Lancet Oncol.* 2010 Aug;11(8):725–32.
- SR182. Kilpeläinen TP, Auvinen A, Määttänen L, Kujala P, Ruutu M, Stenman U-H, et al. Results of the three rounds of the Finnish Prostate Cancer Screening Trial--the incidence of advanced cancer is decreased by screening. *Int. J. Cancer.* 2010 Oct 1;127(7):1699–705.
- SR183. Boevee SJ, Venderbos LDF, Tammela TLJ, Nelen V, Ciatto S, Kwiatkowski M, et al. Change of tumour characteristics and treatment over time in both arms of the European Randomized study of Screening for Prostate Cancer. *Eur. J. Cancer.* 2010 Nov;46(17):3082–9.
- SR184. Finne P, Fallah M, Hakama M, Ciatto S, Hugosson J, De Koning H, et al. Lead-time in the European Randomised Study of Screening for Prostate Cancer. *Eur. J. Cancer.* 2010 Nov;46(17):3102–8.
- SR185. Kerkhof M, Roobol MJ, Cuzick J, Sasieni P, Roemeling S, Schröder FH, et al. Effect of the correction for noncompliance and contamination on the estimated reduction of metastatic prostate cancer within a randomized screening trial (ERSPC section Rotterdam). *Int. J. Cancer.* 2010 Dec 1;127(11):2639–44.
- SR186. Carlsson S, Aus G, Bergdahl S, Khatami A, Lodding P, Stranne J, et al. The excess burden of side-effects from treatment in men allocated to screening for prostate cancer. The Göteborg randomised population-based prostate cancer screening trial. *Eur. J. Cancer.* 2011 Mar;47(4):545–53.
- SR187. Schröder FH, Hugosson J, Roobol MJ, Tammela TLJ, Ciatto S, Nelen V, et al. Prostate-Cancer Mortality at 11 Years of Follow-up. *New England Journal of Medicine.* 2012 Mar 15;366(11):981–90.

### ***Norrköping***

- SR188. Varenhorst E, Carlsson P, Capik E, Löfman O, Pedersen KV. Repeated screening for carcinoma of the prostate by digital rectal examination in a randomly selected population. *Acta Oncol.* 1992;31(8):815–21.
- SR189. Holmberg H, Carlsson P, Löfman O, Varenhorst E. Economic evaluation of screening for prostate cancer: a randomized population based programme during a 10-year period in Sweden. *Health Policy.* 1998 Aug;45(2):133–47.

SR190. Sennfält K, Sandblom G, Carlsson P, Varenhorst E. Costs and effects of prostate cancer screening in Sweden--a 15-year follow-up of a randomized trial. *Scand. J. Urol. Nephrol.* 2004;38(4):291–8.

SR191. Sandblom G, Varenhorst E, Löfman O, Rosell J, Carlsson P. Clinical consequences of screening for prostate cancer: 15 years follow-up of a randomised controlled trial in Sweden. *Eur. Urol.* 2004 Dec;46(6):717–723; discussion 724.

SR192. Sandblom G, Varenhorst E, Rosell J, Lofman O, Carlsson P. Randomised prostate cancer screening trial: 20 year follow-up. *BMJ.* 2011 Mar 31;342:d1539–d1539.

#### ***Prostate, Lung, Colorectal and Ovarian Cancer Screening Trial (PLCO)***

SR193. Andriole GL, Crawford ED, Grubb RL, Buys SS, Chia D, Church TR, et al. Mortality results from a randomized prostate-cancer screening trial. *N. Engl. J. Med.* 2009 Mar 26;360(13):1310–9.

SR194. Andriole GL, Crawford ED, Grubb RL 3rd, Buys SS, Chia D, Church TR, et al. Prostate Cancer Screening in the Randomized Prostate, Lung, Colorectal, and Ovarian Cancer Screening Trial: Mortality Results after 13 Years of Follow-up. *Journal of the National Cancer Institute.* 2012 Jan 18;104(2):125–32.

#### ***Quebec***

SR195. Labrie F, Cusan L, Gomez J, Levesque J, Candas B. Screening and treatment of localized prostate cancer decreases mortality: First analysis of the first prospective and randomized study on prostate cancer screening. *Aging Male.* 1999 Jan;2:33–43.

SR196. Labrie F, Candas B, Dupont A, Cusan L, Gomez JL, Suburu RE, et al. Screening decreases prostate cancer death: first analysis of the 1988 Quebec prospective randomized controlled trial. *Prostate.* 1999 Feb 1;38(2):83–91.

SR197. Labrie F, Candas B, Cusan L, Gomez JL, Bélanger A, Brousseau G, et al. Screening decreases prostate cancer mortality: 11-year follow-up of the 1988 Quebec prospective randomized controlled trial. *Prostate.* 2004 May 15;59(3):311–8.

#### ***Stockholm***

SR198. Kjellman A, Akre O, Norming U, Törnblom M, Gustafsson O. 15-year followup of a population based prostate cancer screening study. *J. Urol.* 2009 Apr;181(4):1615–1621; discussion 1621.



## **Included in the supplementary analysis**

### **Screening for lung cancer with CT scans**

#### ***Danish Lung Cancer Screening Trial (DLCST)***

SR199. Pedersen JH, Ashraf H, Dirksen A, Bach K, Hansen H, Toennesen P, et al. The Danish randomized lung cancer CT screening trial--overall design and results of the prevalence round. *J Thorac Oncol*. 2009 May;4(5):608–14.

#### ***Nederlands Leuvens Longkanker Screenings Onderzoek (NELSON) / Dutch Belgian randomized lung cancer screening trial***

SR200. Van Klaveren RJ, Oudkerk M, Prokop M, Scholten ET, Nackaerts K, Vernhout R, et al. Management of lung nodules detected by volume CT scanning. *N. Engl. J. Med*. 2009 Dec 3;361(23):2221–9.

SR201. Van der Aalst CM, Van Klaveren RJ, Van den Bergh KAM, Willemsen MC, De Koning HJ. The impact of a lung cancer computed tomography screening result on smoking abstinence. *Eur. Respir. J*. 2011 Jun;37(6):1466–73.

### **Screening for lung cancer with chest X-ray**

#### ***Prostate, Lung, Colorectal and Ovarian Cancer Screening Trial (PLCO)***

SR202. Oken MM, Marcus PM, Hu P, Beck TM, Hocking W, Kvale PA, et al. Baseline chest radiograph for lung cancer detection in the randomized Prostate, Lung, Colorectal and Ovarian Cancer Screening Trial. *J. Natl. Cancer Inst*. 2005 Dec 21;97(24):1832–9.

SR203. Croswell JM, Kramer BS, Kreimer AR, Prorok PC, Xu J-L, Baker SG, et al. Cumulative incidence of false-positive results in repeated, multimodal cancer screening. *Ann Fam Med*. 2009 Jun;7(3):212–22.

SR204. Hocking WG, Hu P, Oken MM, Winslow SD, Kvale PA, Prorok PC, et al. Lung cancer screening in the randomized Prostate, Lung, Colorectal, and Ovarian (PLCO) Cancer Screening Trial. *J. Natl. Cancer Inst*. 2010 May 19;102(10):722–31.

### **Screening for colorectal cancer with sigmoidoscopy or colonoscopy**

#### ***Norwegian Colorectal Cancer Prevention screening study (NORCCAP)***

SR205. Gondal G, Grotmol T, Hofstad B, Bretthauer M, Eide TJ, Hoff G. The Norwegian Colorectal Cancer Prevention (NORCCAP) screening study: baseline findings and implementations for clinical work-up in age groups 50–64 years. *Scand. J. Gastroenterol*. 2003 Jun;38(6):635–42.

#### ***Prostate, Lung, Colorectal and Ovarian Cancer Screening Trial (PLCO)***

SR206. Schoen RE, Pinsky PF, Weissfeld JL, Bresalier RS, Church T, Prorok P, et al. Results of repeat sigmoidoscopy 3 years after a negative examination. *JAMA*. 2003 Jul 2;290(1):41–8.

SR207. Weissfeld JL, Schoen RE, Pinsky PF, Bresalier RS, Church T, Yurgalevitch S, et al. Flexible sigmoidoscopy in the PLCO cancer screening trial: results from the baseline screening examination of a randomized trial. *J. Natl. Cancer Inst*. 2005 Jul 6;97(13):989–97.

SR208. Schoen RE, Weissfeld JL, Pinsky PF, Riley T. Yield of advanced adenoma and cancer based on polyp size detected at screening flexible sigmoidoscopy. *Gastroenterology*. 2006;131(6): 1683-9.

SR209. Weissfeld JL, Schoen RE, Pinsky PF, Bresalier RS, Doria-Rose VP, Laiyemo AO, et al. Flexible sigmoidoscopy in the randomized prostate, lung, colorectal, and ovarian (PLCO) cancer screening trial: added yield from a second screening examination. *J. Natl. Cancer Inst.* 2012 Feb 22;104(4):280-9.

#### ***Screening for Colon Rectum trial (SCORE)***

SR210. Segnan N, Senore C, Andreoni B, Aste H, Bonelli L, Crosta C, et al. Baseline findings of the Italian multicenter randomized controlled trial of "once-only sigmoidoscopy"--SCORE. *J. Natl. Cancer Inst.* 2002 Dec 4;94(23):1763-72.

#### ***U.K. Flexible Sigmoidoscopy Study***

SR211. Frew E, Wolstenholme JL, Atkin W, Whyne DK. Estimating time and travel costs incurred in clinic based screening: flexible sigmoidoscopy screening for colorectal cancer. *J Med Screen.* 1999;6(3):119-23.

SR212. Miles A, Wardle J, McCaffery K, Williamson S, Atkin W. The effects of colorectal cancer screening on health attitudes and practices. *Cancer Epidemiol. Biomarkers Prev.* 2003 Jul;12(7):651-5.

### **Screening for colorectal cancer with faecal occult blood testing**

#### ***Finland***

SR213. Malila N, Oivanen T, Hakama M. Implementation of colorectal cancer screening in Finland: experiences from the first three years of a public health programme. *Z Gastroenterol.* 2008 Apr;46 Suppl 1:S25-28.

SR214. Malila N, Palva T, Malminiemi O, Paimela H, Anttila A, Hakulinen T, et al. Coverage and performance of colorectal cancer screening with the faecal occult blood test in Finland. *J Med Screen.* 2011;18(1):18-23.

#### ***Funen***

SR215. Jensen BM, Kronborg O, Fenger C. Interval cancers in screening with fecal occult blood test for colorectal cancer. *Scand. J. Gastroenterol.* 1992 Sep;27(9):779-82.

#### ***Nottingham***

SR216. Moss SM, Hardcastle JD, Coleman DA, Robinson MH, Rodrigues VC. Interval cancers in a randomized controlled trial of screening for colorectal cancer using a faecal occult blood test. *Int J Epidemiol.* 1999 Jun;28(3):386-90.

### **Screening for liver cancer in Hepatitis B patients (several tests)**

#### ***Yang***

SR217. Zhang B, Yang B. Combined alpha fetoprotein testing and ultrasonography as a screening test for primary liver cancer. *J Med Screen.* 1999;6(2):108-10.

### **Screening for breast cancer with mammography**

#### ***Edinburgh***

SR218. Screening for breast cancer. Report from Edinburgh Breast Screening Clinic. *Br Med J*. 1978 Jul 15;2(6131):175–8.

#### ***Malmö I***

SR219. Andersson I, Andrén L, Hildell J, Linell F, Ljungqvist U, Pettersson H. Breast cancer screening with mammography: a population-based, randomized trial with mammography as the only screening mode. *Radiology*. 1979 Aug;132(2):273–6.

SR220. Andersson I. Radiographic screening for breast carcinoma. I. Program and primary findings in 45–69 year old women. *Acta Radiol Diagn (Stockh)*. 1981;22(2):185–94.

#### ***U.K. Age trial***

SR221. Johns LE, Moss SM. False-positive results in the randomized controlled trial of mammographic screening from age 40 (“Age” trial). *Cancer Epidemiol. Biomarkers Prev*. 2010 Nov;19(11):2758–64.

### **Oral cancer screening (several tests)**

#### ***Sankaranarayanan***

SR222. Ramadas K, Arrossi S, Thara S, Thomas G, Jissa V, Fayette JM, et al. Which socio-demographic factors are associated with participation in oral cancer screening in the developing world? Results from a population-based screening project in India. *Cancer Detect. Prev*. 2008;32(2):109–15.

### **Ovarian cancer screening (several tests)**

#### ***Jacobs***

SR223. Menon U, Talaat A, Jeyarajah AR, Rosenthal AN, MacDonald ND, Skates SJ, et al. Ultrasound assessment of ovarian cancer risk in postmenopausal women with CA125 elevation. *Br. J. Cancer*. 1999 Jul;80(10):1644–7.

SR224. Menon U, Talaat A, Rosenthal AN, Macdonald ND, Jeyarajah AR, Skates SJ, et al. Performance of ultrasound as a second line test to serum CA125 in ovarian cancer screening. *BJOG*. 2000 Feb;107(2):165–9.

#### ***Prostate, Lung, Colorectal and Ovarian Cancer Screening Trial (PLCO)***

SR225. Buys SS, Partridge E, Greene MH, Prorok PC, Reding D, Riley TL, et al. Ovarian cancer screening in the Prostate, Lung, Colorectal and Ovarian (PLCO) cancer screening trial: findings from the initial screen of a randomized trial. *Am. J. Obstet. Gynecol*. 2005 Nov;193(5):1630–9.

SR226. Partridge E, Kreimer AR, Greenlee RT, Williams C, Xu J-L, Church TR, et al. Results from four rounds of ovarian cancer screening in a randomized trial. *Obstet Gynecol*. 2009 Apr;113(4):775–82.

### **Prostate cancer screening (several tests)**

#### ***European Randomized Study of Screening for Prostate Cancer (ERSPC)***

SR227. Rietbergen JBW, Kruger AEB, Kranse R, Schroder FH. Complications of transrectal ultrasound-guided systematic sextant biopsies of the prostate: Evaluation of complication rates and risk factors within a population-based screening program. *Urology*. 1997;49(6): 875-880.

SR228. Vis AN, Hoedemaeker RF, Roobol M, Schröder FH, Van der Kwast TH. The predictive value for prostate cancer of lesions that raise suspicion of concomitant carcinoma: an evaluation from a

randomized, population-based study of screening for prostate cancer. *Cancer*. 2001 Aug 1;92(3):524–34.

- SR229. Ciatto S, Gervasi G, Frullini P, Zendron P, Zappa M. Specific features of the Italian section of the ERSPC. *BJU Int*. 2003 Dec;92 Suppl 2:30–2.
- SR230. Hugosson J, Aus G, Bergdahl S, Fernlund P, Frösing R, Lodding P, et al. Population-based screening for prostate cancer by measuring free and total serum prostate-specific antigen in Sweden. *BJU Int*. 2003 Dec;92 Suppl 2:39–43.
- SR231. Kwiatkowski M, Huber A, Stamm B, Lehmann K, Wernli M, Häfeli A, et al. Features and preliminary results of prostate cancer screening in Canton Aargau, Switzerland. *BJU Int*. 2003 Dec;92 Suppl 2:44–7.
- SR232. Villers A, Malavaud B, Rebillard X, Bataille V, Iborra F. ERSPC: features and preliminary results of France. *BJU Int*. 2003 Dec;92 Suppl 2:27–9.
- SR233. Kwiatkowski M, Huber A, Moschopoulos M, Lehmann K, Wernli M, Häfeli A, et al. Prostate cancer screening: results of a prospective trial in Canton Aargau, Switzerland. *Swiss Med Wkly*. 2004 Oct 2;134(39-40):580–5.
- SR234. Postma R, Schröder FH, Van Leenders GJLH, Hoedemaeker RF, Vis AN, Roobol MJ, et al. Cancer detection and cancer characteristics in the European Randomized Study of Screening for Prostate Cancer (ERSPC)--Section Rotterdam. A comparison of two rounds of screening. *Eur. Urol*. 2007 Jul;52(1):89–97.
- SR235. Kilpeläinen TP, Tammela TL, Määttänen L, Kujala P, Stenman UH, Ala-Opas M, Murtola TJ, Auvinen A. False-positive screening results in the Finnish prostate cancer screening trial. *Br J Cancer*. 2010 Feb 2;102(3):469–74.
- SR236. Kilpeläinen TP, Tammela TL, Roobol M, Hugosson J, Ciatto S, Nelen V, Moss S, Määttänen L, Auvinen A. False-positive screening results in the European randomized study of screening for prostate cancer. *Eur J Cancer*. 2011 Dec;47(18):2698–705.

#### ***Norrköping***

- SR237. Varenhorst E, Pedersen KV, Carlsson P, Berglund K, Löfman O. Screening for carcinoma of the prostate in a randomly selected population using duplicate digital rectal examination. *Acta Oncol*. 1991;30(2):273–5.

#### ***Prostate, Lung, Colorectal and Ovarian Cancer Screening Trial (PLCO)***

- SR238. Andriole GL, Levin DL, Crawford ED, Gelmann EP, Pinsky PF, Chia D, et al. Prostate Cancer Screening in the Prostate, Lung, Colorectal and Ovarian (PLCO) Cancer Screening Trial: findings from the initial screening round of a randomized trial. *J. Natl. Cancer Inst*. 2005 Mar 16;97(6):433–8.
- SR239. Grubb RL 3rd, Pinsky PF, Greenlee RT, Izmirlian G, Miller AB, Hickey TP, et al. Prostate cancer screening in the Prostate, Lung, Colorectal and Ovarian cancer screening trial: update on findings from the initial four rounds of screening in a randomized trial. *BJU Int*. 2008 Dec;102(11):1524–30.
- SR240. Crawford ED, Grubb R 3rd, Black A, Andriole GL Jr, Chen M-H, Izmirlian G, et al. Comorbidity and mortality results from a randomized prostate cancer screening trial. *J. Clin. Oncol*. 2011 Feb 1;29(4):355–61.

**Quebec**

SR241. Labrie F, Candas B, Cusan L, Gomez JL, Diamond P, Suburu R, et al. Diagnosis of advanced or noncurable prostate cancer can be practically eliminated by prostate-specific antigen. *Urology*. 1996 Feb;47(2):212–7.

SR242. Candas B, Cusan L, Gomez JL, Diamond P, Suburu RE, Lévesque J, et al. Evaluation of prostatic specific antigen and digital rectal examination as screening tests for prostate cancer. *Prostate*. 2000 Sep 15;45(1):19–35.
