# Supplementary material for: Quantification of harms in cancer screening trials: literature review
Source: PubMed Central journal article supplement — BMJ. 2013 Sep 16;347:f5334. doi: 10.1136/bmj.f5334 (PMC4793399; doi:10.1136/bmj.f5334), 2013-09-16
Supplement: helb011664.ww4_default.pdf [file helb011664.ww4_default.pdf]

## Appendix 4: Supplementary analyses [posted as supplied by author]

Supplementary table S1: Number of trials of cancer screening that report on cancer mortality, incidence, and harms assuming that the articles without translation had reported all outcomes.

|                                                           | Trials that report data for the screened and control groups* |                               | Trials that report data at least in the screened group† |                               |
|-----------------------------------------------------------|--------------------------------------------------------------|-------------------------------|---------------------------------------------------------|-------------------------------|
|                                                           | Absolute number                                              | Percentage of trials (95% CI) | Absolute number                                         | Percentage of trials (95% CI) |
| <b>Total number of trials</b>                             | 57                                                           |                               | 57                                                      |                               |
| <b>General outcomes</b>                                   |                                                              |                               |                                                         |                               |
| Cancer-specific mortality                                 | 47                                                           | 82% (70%-91%)                 | 47                                                      | 82% (70%-91%)                 |
| Cancer-specific incidence                                 | 51                                                           | 89% (78%-96%)                 | 53                                                      | 93% (83%-98%)                 |
| <b>Harm outcomes</b>                                      |                                                              |                               |                                                         |                               |
| Withdrawals due to adverse events                         | 5                                                            | 9% (3%-19%)                   | 7                                                       | 12% (5%-24%)                  |
| Numerical estimate for overdiagnosis                      | 8                                                            | 14% (6%-26%)                  | 8                                                       | 14% (6%-26%)                  |
| Numerical estimate for false-positive findings            | 5                                                            | 9% (3%-19%)                   | 20                                                      | 35% (23%-49%)                 |
| Numerical estimate for negative psychosocial consequences | 9                                                            | 16% (7%-28%)                  | 12                                                      | 21% (11%-34%)                 |
| Numerical estimate for somatic complications              | 15                                                           | 26% (16%-40%)                 | 24                                                      | 42% (29%-56%)                 |
| Numerical estimate for invasive procedures                | 28                                                           | 49% (36%-63%)                 | 47                                                      | 82% (70%-91%)                 |
| All-cause mortality                                       | 36                                                           | 63% (49%-76%)                 | 36                                                      | 63% (49%-76%)                 |

\*210 articles provided data for both the intervention and the control groups (198 included in the main analysis and 12 articles which were not translated). † 242 articles provided data for at least the intervention group (210 for both groups and 44 for the screened group alone). 95%CI: 95% exact confidence interval.

Supplementary table S2: Number of trials that report on cancer mortality, incidence, and harms stratified by continent where it was performed.

|                                                                           | Africa | Asia       | Europe     | North America |
|---------------------------------------------------------------------------|--------|------------|------------|---------------|
| <b>Total number of trials</b>                                             | 1      | 8          | 31         | 17            |
| <b>General outcomes</b>                                                   |        |            |            |               |
| Cancer-specific mortality                                                 | 0      | 6          | 25         | 16            |
| Cancer-specific incidence                                                 | 1      | 8          | 29         | 13            |
| <b>Harm outcomes</b>                                                      |        |            |            |               |
| Withdrawals due to adverse events                                         | 0      | 0          | 1          | 0             |
| Numerical estimate for overdiagnosis                                      | 0      | 0          | 3          | 1             |
| Numerical estimate for false-positive findings                            | 0      | 0          | 3          | 2             |
| Numerical estimate for negative psychosocial consequences                 | 0      | 0          | 3          | 2             |
| Numerical estimate for somatic complications                              | 0      | 0          | 7          | 4             |
| Numerical estimate for invasive procedures                                | 0      | 3          | 14         | 10            |
| All-cause mortality                                                       | 0      | 2          | 20         | 12            |
| <b>Percentage of space devoted to harm: median ( interquartile range)</b> | 0%     | 5% (0-10%) | 13%(5-20%) | 13% (2-19%)   |

This table presents the number of trials that provided data for each outcome for both the intervention and control group.

Supplementary table S3: Number of trials that report on cancer mortality, incidence, and harms stratified by type of comparator

|                                                                    | Usual care | Active comparator |
|--------------------------------------------------------------------|------------|-------------------|
| <b>Total number of trials</b>                                      | 46         | 11                |
| General outcomes                                                   |            |                   |
| Cancer-specific mortality                                          | 38         | 9                 |
| Cancer-specific incidence                                          | 42         | 9                 |
| Harm outcomes                                                      |            |                   |
| Withdrawals due to adverse events                                  | 1          | 0                 |
| Numerical estimate for overdiagnosis                               |            |                   |
| Numerical estimate for false-positive findings                     | 4          | 1                 |
| Numerical estimate for negative psychosocial consequences          |            |                   |
| Numerical estimate for somatic complications                       | 7          | 4                 |
| Numerical estimate for invasive procedures                         |            |                   |
| All-cause mortality                                                | 28         | 6                 |
| Percentage of space devoted to harm: median ( interquartile range) |            |                   |
|                                                                    | 9% (2-18%) | 13% (7-18%)       |

This table presents the number of trials that provided data for each outcome for both the intervention and control group.
